# Supplementary material for: Physical Activity and Exercise as a Tool to Cure Anxiety and Posttraumatic Stress Disorder
Source: Hindawi journal article supplement (doi:10.1155/2023/4294753), 2023-08-08
Supplement: f1 [file 4294753.f1.docx]

**Physical Activity and Exercise as a Tool to Cure Anxiety and Post-traumatic Stress Disorder: A Review**

Saima Sabria, Nadia Rashidb and Zhi-Xiong Maoa,*

*aSchool of Psychology, Beijing Sport University, Beijing, China;*

*bDepartment of Psychology, Bahauddin Zikriya University, Multan, Pakistan*

*corresponding author: [zhxmao@bsu.edu.cn](mailto:zhxmao@bsu.edu.cn) (Zhi-Xiong Mao)

Address: School of Psychology, Beijing Sport University, Haidian District, Beijing 100084, China.

**Electronic Search strategy**

**KEYWORDS**

- PTSD
- PTSD and Physical activity
- PA/Exercise as an alternative treatment for PTSD
- Aerobic impact on PTSD
- Aerobic and anaerobic as an add-on therapy for PTSD
- Anxiety disorder
- Types of anxiety disorder
- PA/Exercise impact on Anxiety disorder
- PA/Exercise impact on different types of Anxiety disorder
- Benefits of physical activity on individuals with anxiety
- How aerobic and anaerobic exercises decrease the intensity of anxiety
- Physical activity impact on mental disorders
- Advantages of physical activity for PTSD and Anxiety Disorder
- Exercise modalities for the improvement of anxiety and PTSD
- Exercise decreases the symptomology of PTSD and Anxiety

**Key Terms/Phases**

- Physical activity health outcomes for individuals with anxiety and PTSD.
- Aerobic & anaerobic exercise on PTSD/Anxiety.
- PA/Exercise interventions on anxiety.
- PA/Exercise interventions on different types of anxiety disorders.
- How PA/exercise impact on the symptoms of generalized anxiety disorder.
- Aerobic exercises as an add-on treatment for mental health.
- Anaerobic exercises as an add-on treatment for PTSD.
- Clinical outcomes of PA/Exercise on PTSD and Anxiety,
- How inactivity impacts individuals with PTSD and Anxiety
- Aerobic exercise as a therapeutic intervention for PTSD and anxiety
- Anaerobic exercises as a treatment intervention for PTSD and Anxiety

**Search Engines**

Following are the search engines used for data scanning

1. PUBMED
2. PsycINFO
3. Google Scholar
4. Science Direct
5. Semantic engine
6. PsycINFO
7. Onlinelibrary

**Table 1**

| **PUBMED** | | | |
| --- | --- | --- | --- |
| #3 | Tian 2022 | #47 | Middelkamp 2016 |
| #4 | Arnson 2007 | #48 | Netz 2003 |
| #5 | Ashdown 2019 | #49 | Newman 2007 |
| #6 | Asmundson | #51 | Nutt 2004 |
| #7 | Aylett 2018 | #52 | Oppizzi 2018 |
| #8 | Backmand 2009 | #53 | Ouimette 2011 |
| #11 | Barbour 2007 | #54 | Paluska 2000 |
| #140 | Bremner 2006 | #55 | Petruzzello 1991 |
| #14 | Broman-Fulks 2004 | #56 | Pitman 2012 |
| #15 | Broman-Fulks 2008 | #59 | Roelofs 2009 |
| #16 | Broman-Fulks 2015 | #60 | Rosenbaum 2015 |
| #17 | Carek 2011 | #61 | Rosenbaum 2015 |
| #18 | Cassidy 2004 | #58 | Whitworth 2019a |
| #19 | Chwastiak 2011 | #64 | Sexton 1989 |
| #23 | De Moor 2006 | #66 | Sharma 2006 |
| #26 | Esquivel 2002 | #67 | Smits 2008 |
| #27 | Fetzner 2015 | #68 | Smith 2015 |
| #28 | Fox 2007 | #70 | Strohle 2005 |
| #29 | Guszkowska 2004 | #71 | Stubbs 2017 |
| #31 | Hegberg 2019 | #72 | Tetlie 2009 |
| #34 | Jayakody 2014 | #73 | Tremblay 2010 |
| #37 | Koenigs 2009 | #74 | Thaylor 1987 |
| #86 | van der Kolk 2014 | #75 | Tull 2018 |
| #40 | LeardMann 2011 | #147 | Motl 2001 |
| #42 | Maher 2019 | #79 | White 2017 |
| #43 | Manger 2005 | #80 | Woo 2009 |
| #45 | Mason 2012 | #82 | Zhang 2014 |
| #46 | Merom 2008 | #88 | Carter 2021 |
| #83 | Asmundson 2013 | #91 | Deacon 2006 |
| #84 | Bender 2016 | #92 | DeBoer 2012 |
| #85 | Bergeron 2015 | #98 | Halson 2014 |
| #95 | Gelenberg 2000 | #99 | Hall 2015 |
| #96 | Goldstein 2018 | #100 | Hamer 2009 |
| #97 | Hall 2020 | #101 | Harte 2015 |
| #107 | Kenis-Coskun 2022 | #102 | Henriksson 2022 |
| #108 | Kelly 2021 | #103 | Herring 2015 |
| #110 | Kim 2013 | #104 | Herring 2012 |
| #113 | Logue 2018 | #105 | Johnson 2018 |
| #114 | Martinsen 1989 | #120 | Nazari 2020 |
| #124 | Raglin 1990 | #129 | Singh 2023 |
| #125 | Reinhardt 2018 | #130 | Sugawara 2020 |
| #126 | Ressler 2022 | #131 | TSATSOULIS 2006 |
| #133 | Caponnetto 2021 | #134 | Lavie 2015 |
| #128 | Colledge 2022 | #93 | Gergelyfi 2021 |
| #136 | Zhao 2022 | #143 | Dauwan 2021 |
| #137 | Zika 2021 | #144 | De Assis 2008 |
| #138 | Wu 2022 | #145 | Fernández-Bustos 2019 |
| #141 | Chen 2019 | #146 | Leavitt 2014 |
| #76 | Steptoe 1989 | #149 | Nyberg 2019 |
| #148 | Moriarty 2019 | #151 | Erickson |
| #152 | Mikkelson 2017 | #153 | Van Minnen 2010 |
| #154 | Sani 2016 |  |  |

**Table 2**

| PsycINFO | | | |
| --- | --- | --- | --- |
| #9 | Bahrke  1978 | #10 | Bandura 1995 |

**Table 3**

| Sciencedirect engine | | | |
| --- | --- | --- | --- |
| #8 | Backmand 2009 | #139 | Björg 2017 |
| #23 | De Moor 2006 |  |  |

**Table 4**

| Semantic scholar | | | |
| --- | --- | --- | --- |
| #51 | Nutt 2004 | #45 | Mason 2012 |
| #52 | Oppizzi 2018 | #46 | Merom 2008 |
| #53 | Ouimette 2011 | #47 | Middelkamp 2016 |
| #54 | Paluska 2000 | #48 | Netz 2003 |
| #55 | Petruzzello 1991 | #49 | Newman 2007 |
| #56 | Pitman 2012 | #38 | Cohen 2017 |
| #57 | Rebar 2017 | #39 | Zheng 2019 |
| #122 | Powers 2015 | #40 | LeardMann 2011 |
| #59 | Roelofs 2009 | #41 | Leyland 2018 |
| #60 | Rosenbaum 2015 | #42 | Maher 2019 |
| #61 | Rosenbaum 2015 | #43 | Manger 2005 |
| #62 | Rutter 2013 | #34 | Jayakody 2014 |
| #63 | Whitworth 2019b | #35 | Kenari 2014 |
| #64 | Sexton 1989 | #36 | Kim 2014 |
| #67 | Smits 2008 | #37 | Koenigs 2009 |
| #68 | Smith 2015 | #27 | Fetzner 2015 |
| #69 | Stanton 2014 | #28 | Fox 2007 |
| #70 | Strohle 2005 | #29 | Guszkowska 2004 |
| #71 | Stubbs 2017 | #30 | Guszkowska 2005 |
| #72 | Tetlie 2009 | #31 | Hegberg 2019 |
| #121 | Pennington 2017 | #32 | Herring 2016 |
| #74 | Thaylor 1987 | #23 | De Moor 2006 |
| #75 | Tull 2018 | #19 | Chwastiak 2011 |
| #3 | Tian 2022 | #15 | Broman-Fulks 2008 |
| #77 | Vujanovic 2013 | #13 | Brooks 1998 |
| #78 | Whitworth 2017 | #11 | Barbour 2007 |
| #79 | White 2017 | #6 | Asmundson |
| #80 | Woo 2009 | #4 | Arnson 2007 |
| #81 | Yehuda 2015 | #5 | Ashdown 2019 |
| #2 | Alexandratos 2012 | #76 | Steptoe 1989 |
| #87 | Broman-Fulks 2008 | #94 | Gaudlitz 2015 |
| #89 | Caspersen 1985 | #95 | Gelenberg 2000 |
| #90 | Chekroud 2018 | #96 | Goldstein 2018 |
| #98 | Halson 2014 | #97 | Hall 2020 |
| #99 | Hall 2015 | #105 | Johnson 2018 |
| #100 | Hamer 2009 | #106 | Katula 1999 |
| #101 | Harte 2015 | #112 | Ley 2018 |
| #102 | Henriksson 2022 | #113 | Logue 2018 |
| #103 | Herring 2015 | #114 | Martinsen 1989 |
| #104 | Herring 2012 | #115 | McGranahan 2021 |
| #123 | Plag 2020 | #116 | Mitchell 2014 |
| #118 | Morey 2012 | #117 | Motta 2019 |
| #119 | Naderi 2019 | #127 | Romero-Perez 2020 |
| #120 | Nazari 2020 | #133 | Caponnetto 2021 |
| #135 | Colledge 2020 | #128 | Colledge 2022 |
| #136 | Zhao 2022 | #141 | Chen 2019 |
| #137 | Zika 2021 | #143 | Dauwan 2021 |
| #138 | Wu 2022 | #144 | De Assis 2008 |
| #148 | Moriarty 2019 | #145 | Fernández-Bustos 2019 |
| #149 | Nyberg 2019 | #146 | Leavitt 2014 |
| #147 | Motl 2001 |  |  |

**Table 5**

| Google Scholar | | | |
| --- | --- | --- | --- |
| #61 | Rosenbaum 2015 | #50 | Caddick 2014 |
| #62 | Rutter 2013 | #51 | Nutt 2004 |
| #109 | Khakpoor 2019 | #52 | Oppizzi 2018 |
| #64 | Sexton 1989 | #53 | Ouimette 2011 |
| #65 | Shamus 2009 | #54 | Paluska 2000 |
| #66 | Sharma 2006 | #55 | Petruzzello 1991 |
| #67 | Smits 2008 | #56 | Pitman 2012 |
| #68 | Smith 2015 | #57 | Rebar 2017 |
| #69 | Stanton 2014 | #44 | Manger 2000 |
| #70 | Strohle 2005 | #45 | Mason 2012 |
| #71 | Stubbs 2017 | #46 | Merom 2008 |
| #72 | Tetlie 2009 | #47 | Middelkamp 2016 |
| #111 | La Forge 2005 | #48 | Netz 2003 |
| #74 | Thaylor 1987 | #37 | Koenigs 2009 |
| #75 | Tull 2018 | #38 | Cohen 2017 |
| #113 | Logue 2018 | #112 | Ley 2018 |
| #77 | Vujanovic 2013 | #40 | LeardMann 2011 |
| #78 | Whitworth 2017 | #31 | Hegberg 2019 |
| #79 | White 2017 | #32 | Herring 2016 |
| #80 | Woo 2009 | #33 | Hoge 2004 |
| #81 | Yehuda 2015 | #34 | Jayakody 2014 |
| #82 | Zhang 2014 | #35 | Kenari 2014 |
| #58 | Reiss 1991 | #28 | Fox 2007 |
| #59 | Roelofs 2009 | #29 | Guszkowska 2004 |
| #42 | Maher 2019 | #24 | Dunn 2010 |
| #22 | De Coverley 1987 | #13 | Brooks 1998 |
| #17 | Carek 2011 | #14 | Broman-Fulks 2004 |
| #18 | Cassidy 2004 | #15 | Broman-Fulks 2008 |
| #9 | Bahrke  1978 | #6 | Asmundson |
| #4 | Arnson 2007 |  |  |

**Table 6**

| Online library | |
| --- | --- |
| #26 | Esquivel 2002 |

**Table 7**

| **Others** | | |
| --- | --- | --- |
| Sr | Author name | Source |
| #1 | Akandere 2008 | The Sport Journal |
| #142 | D. H. H. S. 2002 | U.S. Department of Health and Human Services (HHS): https://www.hhs.gov/ |
| #150 | Biddle 2001 | Researchgate |

The followings are the inclusion criteria.

1. Studies with the relevant literature;
2. Studies with individuals diagnosed PTSD/Anxiety as per the Diagnostic and Statistical Manual of Mental Disorders (DSM-IV, DSM-IV-TR) or International Classification of Diseases – Tenth Revision (ICD-10).
3. The PA/exercise was assessed at baseline.
4. Single or double Blinding on the subject.
5. Studies measuring the relationship between exercise and mental/physical health of PTSD & Anxiety.
6. Studies measure the effectiveness of different sports activities on specific symptomology.

Followings are the Exclusion criteria

1. Other psychiatric disorder
2. Uncontrolled or mixed population
3. Studies on animals are excluded from the results, some are limited to literature.

**Table 8**

| **Sr.** | **Author** | **Article Name** | **Search Engine** |
| --- | --- | --- | --- |
| #1 | Akandere 2008 | The Effect of Physical Exercise on Anxiety. | The Sport Journal |
| #2 | Alexandratos 2012 | The impact of exercise on the mental health and quality of life of people with severe mental illness: a critical review. | Semantic scholar |
| #3 | Tian 2022 | The Effect of Physical Activity on Anxiety: The Mediating Role of Subjective Well-Being and the Moderating Role of Gender. | PUBMED, Semantic Scholar. |
| #4 | Arnson 2007 | Physical activity protects male patients with post-traumatic stress disorder from developing severe fibromyalgia | Google Scholar, PUBMED, semantic scholar |
| #5 | Ashdown-Franks 2019 | Exercise as medicine for mental and substance use disorders: A meta-review of the benefits for neuropsychiatric and cognitive outcomes. | PUBMED, semantic scholar |
| #6 | Asmundson 2013 | A contemporary review of the anxiolytic effects of exercise for anxiety and its disorders. | Google Scholar, PUBMED, semantic scholar |
| #7 | Aylett 2018 | Exercise in the treatment of clinical anxiety in general practice - A systematic review and meta-analysis. | PUBMED |
| #8 | Backmand 2009 | Physical activity, mood and the functioning of daily living A longitudinal study among former elite athletes and referents in middle and old age. | PUBMED, sciencedirect |
| #9 | Bahrke  1978 | Anxiety reduction following exercise and meditation | Google Scholar  Psycnet |
| #10 | Bandura 1995 | Self-efficacy in changing societies. | Psycnet |
| #11 | Barbour 2007 | Exercise as a treatment for depression and other psychiatric disorders: a review. | PUBMED, semanticscholar |
| #12 | Biddle 2007 | Psychology of Physical Activity: Determinants, Well-being, and Interventions. | Google Scholar, researchgate |
| #13 | Brooks 1998 | Comparison of aerobic exercise, clomipramine, and placebo in the treatment of panic disorder | Google Scholar  semanticscholar |
| #14 | Broman-Fulks 2004 | Effects of aerobic exercise on anxiety sensitivity. | PUBMED  Google Scholar  Sciencedirect |
| #15 | Broman-Fulks 2008 | Evaluation of a brief aerobic exercise intervention for high anxiety sensitivity | PUBMED  Google Scholar  Semantic scholar |
| #16 | Broman-Fulks 2015 | Effects of a single bout of aerobic exercise versus resistance training on cognitive vulnerabilities for anxiety disorders | PUBMED |
| #17 | Carek 2011 | Exercise and the treatment of depression and anxiety. | PUBMED, Google Scholar |
| #18 | Cassidy 2004 | Association between lifestyle factors and mental health measures among community-dwelling older women | PUBMED, Google Scholar |
| #19 | Chwastiak 2011 | Association of psychiatric illness and obesity, physical inactivity, and smoking among a national sample of veterans | PUBMED, Sciencedirect  Semantic scholar |
| #20 | Colman 2013 | Physical Activity and Health | Google Scholar |
| #21 | Kupfer 2013 | University of Pittsburgh School of Medicine, *Department of Psychiatry*, 3811 O’Hara Street | Psycnet |
| #22 | De Coverley 1987 | Exercise and mental health. | Google Scholar |
| #23 | De Moor 2006 | Regular exercise, anxiety, depression and personality: A population-based study. | PUBMED, Sciencedirect  Semantic scholar |
| #24 | Dunn 2010 | The effect of exercise on mental health | Google Scholar |
| #25 | Edward 2006 | Physical Exercise and Psychological Well-Being | Google Scholar |
| #26 | Esquivel 2002 | The effects of acute exercise and high lactate levels on 35% CO2 challenge in healthy volunteers. | PUBMED, onlinelibrary |
| #27 | Fetzner 2015 | Aerobic exercise reduces symptoms of posttraumatic stress disorder: a randomized controlled trial. | PUBMED, Google Scholar, Semantic scholar |
| #28 | Fox 2007 | Physical activity and mental well-being in older people participating in the Better Ageing Project. | PUBMED, Google Scholar, Semantic scholar |
| #29 | Guszkowska 2004 | Effects of exercise on anxiety, depression and mood | PUBMED, Google Scholar, Semantic scholar |
| #30 | Guszkowska 2005 | Physical fitness as a resource in coping with stress among high school students. | Semantic scholar, |
| #31 | Hegberg 2019 | Exercise intervention in PTSD: A narrative review and rationale for implementation. | PUBMED, Google Scholar, Semantic scholar |
| #32 | Herring 2016 | Exercise training and health-related quality of life in generalized anxiety disorder | Google Scholar, Semantic scholar |
| #33 | Hoge 2004 | Combat duty in Iraq and Afghanistan, mental health problems, and barriers to care. | Google Scholar |
| #34 | Jayakody 2014 | Exercise for anxiety disorders: systematic review. | PUBMED, Google Scholar, Semantic scholar |
| #35 | Kenari 2014 | Effect of Exercise on Mental Health in the Physical Dimension, Anxiety and Mental Disorder, Social Dysfunction and Depression | Google Scholar, Semantic scholar |
| #36 | Kim 2014 | The Impacts of Physical Exercise on Stress Coping and Well- Being in University Students in the Context of Leisure. | Semantic scholar |
| #37 | Koenigs 2009 | Posttraumatic Stress Disorder: The Role of Medial Prefrontal Cortex and Amygdala | PUBMED, Google Scholar, Semantic scholar |
| #38 | Cohen 2017 | Psychological, social and physical environmental mediators of the scores intervention on physical activity among children living in low-income communities. | Google Scholar, Semantic scholar |
| #39 | Zheng 2019 | Somatic symptoms and their association with anxiety and depression in Chinese patients with cardiac neurosis. | Semantic Scholar |
| #40 | LeardMann 2011 | Prospectively assessed posttraumatic stress disorder and associated physical activity. | PUBMED, Google Scholar, Semantic scholar |
| #41 | Leyland 2018 | Offering physical activity advice to people with serious mental illness: The beliefs of mental health professionals. | Google Scholar, Semantic scholar |
| #42 | Maher 2019 | Do ﬂuctuations in positive aﬀective and physical feeling states predict physical activity and sedentary time?. | PUBMED, Google Scholar, Semantic scholar |
| #43 | Manger 2005 | The impact of an exercise program on posttraumatic stress disorder, anxiety, and depression | PUBMED, Semantic scholar |
| #44 | Manger 2000 | The effects of a community-based aerobic exercise program on posttraumatic stress disorder-related symptoms and concomitant anxiety and depression (dissertation). | Google Scholar |
| #45 | Mason 2012 | Mental health and physical activity interventions: A review of the qualitative literature. | PUBMED, Google Scholar, Semantic scholar |
| #46 | Merom 2008 | Promoting walking as an adjunct intervention to group cognitive behavioral therapy for anxiety disorders: a pilot group randomized trial. | PUBMED, Google Scholar, Semantic scholar |
| #47 | Middelkamp 2016 | The Effects of Two Self-Regulation Interventions to Increase Self-Efficacy and Group Exercise Behavior in Fitness Clubs | PUBMED, Google Scholar, Semantic scholar |
| #48 | Netz 2003 | Mood alterations in mindful versus aerobic exercise modes | PUBMED, Google Scholar, Semantic scholar |
| #49 | Newman 2007 | The effects of aerobic exercise on childhood PTSD, anxiety, and depression. | PUBMED, Semantic scholar |
| #50 | Caddick 2014 | The impact of sport and physical activity on the well-being of combat veterans: A systematic review. | Semantic scholar, Google Scholar |
| #51 | Nutt 2004 | Structural and functional brain changes in posttraumatic stress disorder. | PUBMED, Google Scholar, Semantic scholar |
| #52 | Oppizzi 2018 | The Effect of Physical Activity on PTSD. | PUBMED, Google Scholar, Semantic scholar |
| #53 | Ouimette 2011 | Perceived barriers to care among veterans health administration patients with posttraumatic stress disorder | PUBMED, Google Scholar, Semantic scholar |
| #54 | Paluska 2000 | Physical activity and mental health: current concepts. | PUBMED, Google Scholar |
| #55 | Petruzzello 1991 | A meta-analysis on the anxiety-reducing effects of acute and chronic exercise. | PUBMED, Google Scholar, Semantic scholar |
| #56 | Pitman 2012 | Biological studies of post-traumatic stress disorder | PUBMED, Google Scholar, Semantic scholar |
| #57 | Rebar 2017 | Comorbidity of depression and anxiety in exercise research. | Google Scholar, Semantic scholar |
| #58 | Whitworth 2019a | Feasibility of resistance exercise for posttraumatic stress and anxiety symptoms: a randomized controlled pilot study. | PUBMED |
| #59 | Roelofs 2009 | The influence of rumination and distraction on depressed and anxious mood: A prospective examination of the Response Styles Theory in children and adolescents. | PUBMED, Google Scholar, Semantic scholar |
| #60 | Rosenbaum 2015 | Exercise augmentation compared to usual care for post-traumatic stress disorder: a randomized controlled trial. | PUBMED, Semantic scholar |
| #61 | Rosenbaum 2015 | Physical activity in the treatment of Post-traumatic stress disorder: A systematic review and meta-analysis, | PUBMED, Google Scholar, Semantic scholar |
| #62 | Rutter 2013 | Posttraumatic stress disorder symptoms, depressive symptoms, exercise, and health in college students. | Google Scholar, Semantic scholar |
| #63 | Whitworth 2019b | High intensity resistance training improves sleep quality and anxiety in individuals who screen positive for posttraumatic stress disorder: A randomized controlled feasibility trial. | Semantic Scholar |
| #64 | Sexton 1989 | Exercise intensity and reduction in neurotic symptoms, A controlled follow-up study. | PUBMED, Google Scholar, Semantic scholar |
| #65 | Shamus 2009 | Depressed, low self-esteem: What can exercise do for you? | Google Scholar |
| #66 | Sharma 2006 | Exercise for mental health | PUBMED, Google Scholar, |
| #67 | Smits 2008 | Reducing anxiety sensitivity with exercise. | PUBMED, Google Scholar, Semantic scholar |
| #68 | Smith 2015 | PTSD and obesity in younger and older veterans: results from the mind your heart study. | PUBMED, Google Scholar, Semantic scholar |
| #69 | Stanton 2014 | The mental health benefits of regular physical activity, and its role in preventing depressive illness. | Google Scholar, |
| #70 | Strohle 2005 | The acute antipanic activity of aerobic exercise. | PUBMED, Google Scholar, Semantic scholar |
| #71 | Stubbs 2017 | Physical activity and anxiety: a perspective from the World Health Survey. | PUBMED, Google Scholar, Semantic scholar |
| #72 | Tetlie 2009 | Using exercise to treat patients with severe mental illness: How and why? | PUBMED, Google Scholar, Semantic scholar |
| #73 | Weinstein 2017 | Mental health consequences of exercise withdrawal: A systematic review. | PUBMED |
| #74 | Thaylor 1987 | Energy, tiredness and effects of sugar snack versus moderate exercise. | PUBMED, Google Scholar, Semantic scholar |
| #75 | Tull 2018 | Exploring the role of sedentary behavior and physical activity in depression and anxiety symptom severity among patients with substance use disorders. | PUBMED, Google Scholar, Semantic scholar |
| #76 | Steptoe 1989 | The effects of exercise training on mood and perceived coping ability in anxious adults from the general population. | PUBMED, Semantic Scholar. |
| #77 | Vujanovic 2013 | Smoking status and exercise in relation to PTSD symptoms: a test among trauma-exposed adults. | Google Scholar, Semantic scholar |
| #78 | Whitworth 2017 | Direct and indirect effects of exercise on posttraumatic stress disorder symptoms: A longitudinal study | Google Scholar, Semantic scholar |
| #79 | White 2017 | Domain-specific physical activity and mental health: A meta-analysis. | PUBMED, Google Scholar, Semantic scholar |
| #80 | Woo 2009 | Examining the Exercise - Effect Dose - Response Relationship: Does Duration Influence Frontal EEG Asymmetry? | PUBMED, Google Scholar, Semantic Scholar |
| #81 | Yehuda 2015 | Post-traumatic stress disorder. | Google Scholar, |
| #82 | Zhang 2014 | Study about the effects of different ﬁtness sports on cognitive function and emotion of the aged | PUBMED, Google Scholar, Semantic scholar |
| #83 | Asmundson 2013 | Let's get physical: A contemporary review of the anxiolytic effects of exercise for anxiety and its disorders. | PUBMED |
| #84 | Bender 2016 | High-Intensity Exercise is Associated with Fewer Symptoms of Hyperarousal. AVA Research Review | PUBMED |
| #85 | Bergeron 2015 | International Olympic Committee consensus statement on youth athletic development. | PUBMED |
| #86 | van der Kolk 2014 | Yoga as an adjunctive treatment for posttraumatic stress disorder: a randomized controlled trial. | PUBMED |
| #87 | Broman-Fulks 2008 | Evaluation of a brief aerobic exercise intervention for high anxiety sensitivity. | Semantic Scholar |
| #88 | Carter 2021 | The effect of physical activity on anxiety in children and young people: A systematic review and meta-analysis. | PUBMED |
| #89 | Caspersen 1985 | Physical activity, exercise, and physical fitness: Definitions and distinctions for health-related research. | Semantic Scholar |
| #90 | Chekroud 2018 | Association between physical exercise and mental health in 1•2 million individuals in the USA between 2011 and 2015: A cross-sectional study. | Semantic Scholar |
| #91 | Deacon 2006 | Anxiety sensitivity and its dimensions across the anxiety disorders. | PUBMED |
| #92 | DeBoer 2012 | Exploring exercise as an avenue for the treatment of anxiety disorders. | PUBMED |
| #93 | Gergelyfi 2021 | Mental fatigue correlates with depression of task-related network and augmented DMN activity but spares the reward circuit. | PUBMED |
| #94 | Gaudlitz 2015 | Aerobic exercise training facilitates the effectiveness of cognitive behavioral therapy in panic disorder. | Semantic Scholar |
| #95 | Gelenberg 2000 | Psychiatric and somatic markers of anxiety: Identification and pharmacologic treatment. | Semantic Scholar, PUBMED. |
| #96 | Goldstein 2018 | Veterans Group Exercise: A randomized pilot trial of an integrative exercise program for veterans with posttraumatic stress. | Semantic Scholar, PUBMED. |
| #97 | Hall 2020 | Pilot randomized controlled trial of exercise training for older veterans with PTSD. | Semantic Scholar, PUBMED. |
| #98 | Halson 2014 | Sleep in elite athletes and nutritional interventions to enhance sleep. | Semantic Scholar, PUBMED. |
| #99 | Hall 2015 | Post-traumatic stress disorder, physical activity, and eating behaviors. | Semantic Scholar, PUBMED. |
| #100 | Hamer 2009 | Leisure time physical activity, risk of depressive symptoms, and inflammatory mediators: | Semantic Scholar, PUBMED. |
| #101 | Harte 2015 | Association between exercise and posttraumatic stress symptoms among trauma-exposed adults. | Semantic Scholar, PUBMED. |
| #102 | Henriksson 2022 | Effects of exercise on symptoms of anxiety in primary care patients: A randomized controlled trial. | Semantic Scholar, PUBMED. |
| #103 | Herring 2015 | Effects of exercise on sleep among young women with generalized anxiety disorder. | Semantic Scholar, PUBMED. |
| #104 | Herring 2012 | Feasibility of exercise training for the short-term treatment of generalized anxiety disorder: A randomized controlled trial. | Google Scholar, Semantic Scholar, PUBMED. |
| #105 | Johnson 2018 | Effects of therapeutic horseback riding on post-traumatic stress disorder in military veterans. | Google Scholar, Semantic Scholar, PUBMED. |
| #106 | Katula 1999 | Exercise intensity and self-efficacy effects on anxiety reduction in healthy, older adults. | Semantic Scholar. |
| #107 | Kenis-Coskun 2022 | The effect of telerehabilitation on quality of life, anxiety, and depression in children with cystic fibrosis and caregivers: A single-blind randomized trial. | PUBMED |
| #108 | Kelly 2021 | Trauma-Sensitive Yoga for Post-Traumatic Stress Disorder in Women Veterans who Experienced Military Sexual Trauma: Interim Results from a Randomized Controlled Trial. | PUBMED |
| #109 | Khakpoor 2019 | The concept of "Anxiety sensitivity" in social anxiety disorder presentations, symptomatology, and treatment: A theoretical perspective. | Google Scholar, |
| #110 | Kim 2013 | PTSD symptom reduction with mindfulness-based stretching and deep breathing exercise: Randomized controlled clinical trial of efficacy. | PUBMED |
| #111 | La Forge 2005 | Aligning Mind and Body: Exploring the Disciplines of Mindful Exercise | Google Scholar, |
| #112 | Ley 2018 | "In the sport I am here": Therapeutic processes and health effects of sport and exercise on PTSD. | Google Scholar, Semantic Scholar. |
| #113 | Logue 2018 | Smaller hippocampal volume in posttraumatic stress disorder: A multisite ENIGMA-PGC study. | Google Scholar, Semantic Scholar, PUBMED. |
| #114 | Martinsen 1989 | Aerobic and non-aerobic forms of exercise in the treatment of anxiety disorders. | Semantic Scholar, PUBMED. |
| #115 | McGranahan 2021 | Exercise training effects on sleep quality and symptoms of anxiety and depression in post-traumatic stress disorder: A systematic review and meta-analysis of randomized control trials. | Semantic Scholar, |
| #116 | Mitchell 2014 | A pilot study of a randomized controlled trial of yoga as an intervention for PTSD symptoms in women. | Semantic Scholar, |
| #117 | Motta 2019 | The role of exercise in reducing PTSD and negative emotional states. | Semantic Scholar, |
| #118 | Morey 2012 | Amygdala volume changes in posttraumatic stress disorder in a large case-controlled veterans group. | Semantic Scholar, |
| #119 | Naderi 2019 | The effect of physical exercise on anxiety among the victims of child abuse. | Semantic Scholar, Google Scholar. |
| #120 | Nazari 2020 | The effect of concurrent resistance-aerobic training on serum cortisol level, anxiety, and quality of life in pediatric type 1 diabetes. | Semantic Scholar, PubMed. |
| #121 | Pennington 2017 | The ventromedial prefrontal cortex in a model of traumatic stress: Fear inhibition or contextual processing? | Semantic Scholar. |
| #122 | Powers 2015 | Exercise augmentation of exposure therapy for PTSD: Rationale and pilot efficacy data. | Semantic Scholar. |
| #123 | Plag 2020 | Working out the worries: A randomized controlled trial of high-intensity interval training in generalized anxiety disorder. | Semantic Scholar. |
| #124 | Raglin 1990 | Exercise and mental health. BeRneficial and detrimental effects. | PUBMED |
| #125 | Reinhardt 2018 | Kripalu yoga for military veterans with PTSD: A randomized trial. | PUBMED |
| #126 | Ressler 2022 | Post-traumatic stress disorder: Clinical and translational neuroscience from cells to circuits. | PUBMED |
| #127 | Romero-Perez 2020 | Influence of a physical exercise program on the anxiety and depression in children with obesity. | Semantic Scholar |
| #128 | Colledge 2022 | Individuals at Risk of Exercise Addiction Have Higher Scores for Depression, ADHD, and Childhood Trauma. | PUBMED, Semantic Scholar. |
| #129 | Singh 2023 | Effectiveness of physical activity interventions for improving depression, anxiety and distress: an overview of systematic reviews. | PUBMED |
| #130 | Sugawara 2020 | Effects of interoceptive training on decision making, anxiety, and somatic symptoms. | PUBMED |
| #131 | TSATSOULIS 2006 | The Protective Role of Exercise on Stress System Dysregulation and Comorbidities. | PUBMED |
| #132 | van der Kolk 2014 | Yoga as an adjunctive treatment for posttraumatic stress disorder: a randomized controlled trial. | PUBMED |
| #133 | Caponnetto 2021 | The Effects of Physical Exercise on Mental Health: From Cognitive Improvements to Risk of Addiction. | PUBMED, Semantic Scholar. |
| #134 | Lavie 2015 | Exercise and the heart--the harm of too little and too much. | PUBMED |
| #135 | Colledge 2020 | Mental disorders in individuals at risk for exercise addiction – A systematic review. | Semantic Scholar. |
| #136 | Zhao 2022 | Influence of Aerobic Exercise Load Intensity on Children’s Mental Health. | PUBMED, Semantic Scholar. |
| #137 | Zika 2021 | Physical Activity as a Treatment for Social Anxiety in Clinical and Non-clinical Populations: A Systematic Review and Three Meta-Analyses for Different Study Designs. | PUBMED, Semantic Scholar. |
| #138 | Wu 2022 | The Effect of Physical Exercise on the Elderly’s Anxiety: Based on Systematic Reviews and Meta-Analysis. | PUBMED, Semantic Scholar. |
| #139 | Björg 2017 | Changes in physical activity and sedentary behavior associated with an exercise intervention in depressed adults. | Sciencedirect  Psycnet |
| #140 | Bremner 2006 | Traumatic stress: effects on the brain. | PUBMED |
| #141 | Chen 2019 | Habitual physical activity mediates the acute exercise-induced modulation of anxiety-related amygdala functional connectivity. | PUBMED, Semantic Scholar. |
| #142 | D. H. H. S. 2002 | Physical activity fundamental to preventing disease. Washington: U.S. Department of Health and Human Services, Office of the Assistant Secretary for Planning and Evaluation | U.S. Department of Health and Human Services (HHS): https://www.hhs.gov/ |
| #143 | Dauwan 2021 | Physical exercise improves quality of life, depressive symptoms, and cognition across chronic brain disorders: A transdiagnostic systematic review and meta-analysis of randomized controlled trials. | PUBMED, Semantic Scholar. |
| #144 | De Assis 2008 | Evaluation of physical activity habits in patients with posttraumatic stress disorder. | PUBMED, Semantic Scholar. |
| #145 | Fernández-Bustos 2019 | Effect of physical activity on self-concept: Theoretical model on the mediation of body image and physical self-concept in adolescents. | PUBMED, Semantic Scholar. |
| #146 | Leavitt 2014 | Aerobic exercise increases hippocampal volume and improves memory in multiple sclerosis: Preliminary findings | PUBMED, Semantic Scholar. |
| #147 | Motl 2001 | Naturally occurring changes in physical activity are inversely related to depressive symptoms during early adolescence. | PUBMED, Semantic Scholar. |
| #148 | Moriarty 2019 | Exercise intensity influences prefrontal cortex oxygenation during cognitive testing. | PUBMED, Semantic Scholar. |
| #149 | Nyberg 2019 | Effects of exercise on symptoms of anxiety, cognitive ability, and sick leave in patients with anxiety disorders in primary care: Study protocol for PHYSBI, a randomized controlled trial. | PUBMED, Semantic Scholar. |
| #150 | Biddle 2001 | Psychology of physical activity: Determinants, well-being and interventions. | researchgate |
| #151 | Erickson 2011 | Exercise training increases size of hippocampus and improves memory. | PUBMED |
| #152 | Mikkelson 2017 | Exercise and mental health. Maturitas | PUBMED |
| #153 | Van Minnen 2010 | When do trauma experts choose exposure therapy for PTSD patients? A controlled study of therapist and patient factors. | PUBMED |
| #154 | Sani 2016 | Physical activity and self-esteem: testing direct and indirect relationships associated with psychological and physical mechanisms. | PUBMED |
